# Supplementary material for: Cardiovascular Risk for Patients With and Without Schizophrenia, Schizoaffective Disorder, or Bipolar Disorder
Source: PubMed Central journal article supplement — J Am Heart Assoc. 2022 Mar 9;11(6):e021444. doi: 10.1161/JAHA.121.021444 (PMC9075298; doi:10.1161/jaha.121.021444), 2022-03-09
Supplement: JAH3-11-e021444-s001.pdf [file JAH3-11-e021444-s001.pdf]

## **SUPPLEMENTAL MATERIAL**

**Table S1: Adjusted differences in total CV risk and individual modifiable CV risk factors between patients with and without SMI**

| Cardiovascular Risk                    | OR   | $\beta$ | 95% CI |       | p      |
|----------------------------------------|------|---------|--------|-------|--------|
|                                        |      |         | LL     | UL    |        |
| 10-year ASCVD risk*                    |      | 0.38    | 0.23   | 0.54  | <.0001 |
| 10-year ASCVD risk*, categorical       | 1.48 |         | 1.39   | 1.58  | <.0001 |
| 30-year Lifetime risk†                 | 1.92 |         | 1.82   | 2.01  | <.0001 |
| CHD                                    | 1.19 |         | 1.06   | 1.36  | .004   |
| CVD                                    | 1.23 |         | 1.12   | 1.36  | <.0001 |
| Blood Pressure                         |      |         |        |       |        |
| HTN                                    | 1.26 |         | 1.19   | 1.33  | <.0001 |
| High BP at visit ( $\geq 140/90$ mmHg) | 1.01 |         | 0.96   | 1.06  | .73    |
| SBP                                    |      | -1.43   | -1.73  | -1.14 | <.0001 |
| DBP                                    |      | 1.07    | 0.86   | 1.28  | <.0001 |
| Cholesterol                            |      |         |        |       |        |
| Total cholesterol                      |      | 0.01    | -0.86  | 0.88  | .98    |
| LDL (statin only)                      |      | -6.65   | -8.12  | -5.17 | <.0001 |
| LDL (non-statin only)                  |      | -1.14   | -1.97  | -0.31 | .007   |
| HDL                                    |      | -2.51   | -2.86  | -2.17 | <.0001 |
| Triglycerides                          |      | 22.78   | 20.65  | 24.92 | <.0001 |
| Statin use                             | 1.85 |         | 1.75   | 1.95  | <.0001 |
| Glucose                                |      |         |        |       |        |
| DM                                     | 2.16 |         | 2.03   | 2.29  | <.0001 |
| A1c (DM only)‡                         |      | -0.27   | -0.35  | -0.18 | <.0001 |
| A1c (non DM only)§                     |      | -0.05   | -0.08  | -0.03 | <.0001 |
| A1c (DM only), categorical‡            | 0.75 |         | 0.68   | 0.83  | <.0001 |
| Weight                                 |      |         |        |       |        |
| BMI                                    |      | 1.94    | 1.81   | 2.08  | <.0001 |
| BMI, categorical                       | 1.80 |         | 1.74   | 1.87  | <.0001 |
| Smoking status                         |      |         |        |       | <.0001 |
| Current smoker                         | 3.66 |         | 3.50   | 3.84  |        |
| Former smoker                          | 2.18 |         | 2.08   | 2.29  |        |
| Nonsmoker                              | REF  |         |        |       |        |
| Appropriate aspirin use                | 0.93 |         | 0.66   | 1.31  | .69    |

Note. Models adjusted for age, sex, race, ethnicity and insurance coverage.

ASCVD = 10-year atherosclerotic cardiovascular disease risk; BMI = Body mass index; CHD = Coronary Heart Disease; CVD = Cardiovascular Disease; DBP = Diastolic blood pressure; DM = Diabetes Mellitus; HDL = high density lipoprotein; HTN = Hypertension; LDL = low density lipoprotein; LL = Lower 95% Confidence Limit; REF = Reference group; SBP = Systolic blood pressure; UL = Upper 95% Confidence Limit

\*ASCVD risk is only calculated for patients age 40-75 without known CVD ( $n = 247909$ )

†30 year lifetime risk of cardiovascular disease is only calculated for patients ages 18-59 without known CVD ( $n = 233308$ )

‡Calculated for patients with DM who have available A1c tests within the last 5 years ( $n = 37600$ )

§Calculated for patients without DM who have available A1c tests within the last 5 years ( $n = 33055$ )

||Aspirin use was only calculated for individuals with known CHD ( $n = 15451$ )

**Table S2: Adjusted differences in total CV risk and individual modifiable CV risk factors among people with SMI**

| Cardiovascular Risk                          | Schizophrenia |         |        |       | Schizoaffective |         |        |       | p      |
|----------------------------------------------|---------------|---------|--------|-------|-----------------|---------|--------|-------|--------|
|                                              | OR            | $\beta$ | LL     | UL    | OR              | $\beta$ | LL     | UL    |        |
| 10-year ASCVD risk <sup>†</sup>              |               | -1.02   | -1.58  | -0.47 |                 | -0.49   | -0.95  | -0.04 | .0008  |
| 10-year ASCVD risk, <sup>‡</sup> categorical | 0.73          |         | 0.61   | 0.87  | 1.02            |         | 0.88   | 1.18  | .0008  |
| 30-year Lifetime risk <sup>§</sup>           | 0.81          |         | 0.69   | 0.95  | 1.16            |         | 1.02   | 1.32  | .0002  |
| CHD                                          | 0.59          |         | 0.40   | 0.86  | 0.97            |         | 0.73   | 1.29  | .018   |
| CVD                                          | 0.67          |         | 0.50   | 0.90  | .096            |         | 0.75   | 1.21  | .027   |
| Blood Pressure                               |               |         |        |       |                 |         |        |       |        |
| HTN                                          | 0.85          |         | 0.71   | 1.02  | 0.90            |         | 0.78   | 1.05  | .14    |
| High BP at visit ( $\geq$ 140/90 mmHg)       | 0.74          |         | 0.62   | 0.87  | 0.73            |         | 0.63   | 0.84  | <.0001 |
| SBP                                          |               | -3.35   | -4.33  | -2.37 |                 | -2.13   | -2.94  | -1.32 | <.0001 |
| DBP                                          |               | -2.26   | -2.97  | -1.55 |                 | -1.07   | -1.65  | -0.48 | <.0001 |
| Cholesterol                                  |               |         |        |       |                 |         |        |       |        |
| Total cholesterol                            |               | -7.37   | -10.3  | -4.39 |                 | -4.95   | -7.38  | -2.53 | <.0001 |
| LDL (statin only)                            |               | -7.04   | -11.51 | -2.58 |                 | -7.59   | -11.30 | -3.87 | <.0001 |
| LDL (non-statin only)                        |               | -3.24   | -6.09  | -0.38 |                 | -1.36   | -3.66  | 0.93  | .071   |
| HDL                                          |               | -2.05   | -3.11  | -0.99 |                 | -3.10   | -3.97  | -2.24 | <.0001 |
| Triglycerides                                |               | -8.23   | -16.70 | 0.25  |                 | 6.95    | 0.07   | 13.83 | .006   |
| Statin use                                   | 1.11          |         | 0.95   | 1.30  | 1.38            |         | 1.21   | 1.57  | <.0001 |
| Glucose                                      |               |         |        |       |                 |         |        |       |        |
| DM                                           | 1.01          |         | 0.85   | 1.21  | 1.48            |         | 1.28   | 1.70  | <.0001 |
| A1c (DM only) <sup>  </sup>                  |               | -0.15   | -0.42  | 0.12  |                 | -0.12   | -0.34  | 0.09  | .40    |
| A1c (non DM only) <sup>#</sup>               |               | -0.05   | -0.13  | 0.02  |                 | -0.02   | -0.08  | 0.05  | .36    |
| A1c (DM only), categorical <sup>  </sup>     | 0.76          |         | 0.56   | 1.03  | 0.86            |         | 0.68   | 1.10  | .166   |
| Weight                                       |               |         |        |       |                 |         |        |       |        |
| BMI                                          |               | -0.73   | -1.25  | -0.22 |                 | 0.98    | 0.56   | 1.40  | <.0001 |
| BMI, categorical                             | 0.86          |         | 0.76   | 0.97  | 1.29            |         | 1.17   | 1.42  | <.0001 |
| Smoking status                               |               |         |        |       |                 |         |        |       | <.0001 |
| Current smoker                               | 0.96          |         | 0.83   | 1.11  | 1.16            |         | 1.02   | 1.31  |        |
| Former smoker                                | 0.72          |         | 0.61   | 0.85  | 0.92            |         | 0.80   | 1.05  |        |
| Nonsmoker                                    | REF           |         |        |       | REF             |         |        |       |        |
| Appropriate aspirin use <sup>** ††</sup>     | 1.96          |         | 0.53   | 7.27  | 4.12            |         | 1.27   | 13.32 | .048   |

Note. Models adjusted for age, sex, race, ethnicity, and insurance coverage. ASCVD = 10-year atherosclerotic cardiovascular disease risk; B = unstandardized regression coefficient; BMI = Body mass index; CHD = Coronary Heart Disease; CVD = Cardiovascular Disease; DBP = Diastolic blood pressure; DM = Diabetes Mellitus; HDL = high density lipoprotein; HTN = Hypertension; LDL = low density lipoprotein; OR = Odds Ratio; SBP = Systolic blood pressure

\* Significantly different from schizophrenia ( $p < .05$ )

† Significantly different from schizoaffective disorder ( $p < .05$ )

‡ ASCVD risk is only calculated for patients age 40-75 without CVD ( $n = 5218$ )

§ 30 year lifetime risk of CVD is only calculated for patients ages 18-59 without CVD ( $n = 6217$ )

|| Calculated for patients with DM who have available A1c tests within the last 5 years ( $n = 1470$ )

# Calculated for patients without DM who have available A1c tests within the last 5 years ( $n = 812$ )

\*\* Aspirin use was only calculated for individuals with known CHD ( $n = 337$ )

†† Separation occurred with this model, which inflated the confidence limits
